# Supplementary material for: Agrobacterium fabrum atu0526-Encoding Protein Is the Only Chemoreceptor That Regulates Chemoattraction toward the Broad Antibacterial Agent Formic Acid
Source: MDPI journal article supplement (doi:10.3390/biology10121345), 2021-12-17
Supplement: s1 [file s1]

**Table S1.** Bacterial strains and plasmids used in this study.

| Strains or Plasmids         | Description                                                                                                                                                                            | Source                         |
|-----------------------------|----------------------------------------------------------------------------------------------------------------------------------------------------------------------------------------|--------------------------------|
| <b>Strains</b>              |                                                                                                                                                                                        |                                |
| <i>Escherichia coli</i>     |                                                                                                                                                                                        |                                |
| DH5 $\alpha$                | <i>endA1 hsdR17 supE44 thi-1 recA1 gyrA96 relA1 (argF-lacZYA) U169 <math>\phi</math>80dlacZ.</i>                                                                                       | Bethesda Research Laboratories |
| BL21(DE3)                   | <i>F<sup>-</sup> ompT gal dcm lon hsdSB(rB- mB-) <math>\lambda</math>(DE3 *lacI lacUV5-T7 gene 1 ind1 sam7 nin5)</i>                                                                   | [1]                            |
| Atu0526LBD                  | BL21(DE3) strain with pET30a-Atu0526LBD was transformed in.                                                                                                                            | This study                     |
| R115A                       | BL21(DE3) with pET30a-R115A transformed in.                                                                                                                                            | This study                     |
| 6 $\times$ His-Atu0526      | BL21(DE3) with the pET30a-6 $\times$ His-Atu0526 transformed in.                                                                                                                       | This study                     |
| 6 $\times$ His-SalT         | BL21(DE3) with the pET30a-6 $\times$ His-SalT transformed in.                                                                                                                          | This study                     |
| XL1-Blue MR competent cell  | <i><math>\Delta</math>(mcrA)183 <math>\Delta</math>(mcrCB-hsdSMR-mrr)173 endA1 supE44 thi-1 recA1 gyrA96 relA1 lac [F' lacI<sup>q</sup> bla lacZ Kan<sup>r</sup>]</i>                  | BacterioMatch™                 |
| Atu0526/CheW1               | BacterioMatch™ Two-Hybrid System Reporter Strain with pTRG-CheW1 and pTB-Atu0526 transported in                                                                                        | This study                     |
| Atu0526/CheW2               | BacterioMatch™ Two-Hybrid System Reporter Strain with pTRG-CheW2 and pTB-Atu0526 transported in                                                                                        | This study                     |
| Positive control strain     | BacterioMatch™ Two-Hybrid System Reporter Strain with pTRG-GALL <sup>P</sup> and pTB-LGF2 transported in                                                                               | This study                     |
| Negative-1                  | BacterioMatch™ Two-Hybrid System Reporter Strain with pTRG and pTB-Atu0526 transported in                                                                                              | This study                     |
| Negative-2                  | BacterioMatch™ Two-Hybrid System Reporter Strain with pTRG-CheW1 and pTB transported in                                                                                                | This study                     |
| Negative-3                  | BacterioMatch™ Two-Hybrid System Reporter Strain with pTRG-CheW2 and pTB transported in                                                                                                | This study                     |
| <i>Agrobacterium fabrum</i> |                                                                                                                                                                                        |                                |
| C58                         | Wild-type, nopaline-type pTiC58 plasmid                                                                                                                                                | [2]                            |
| $\Delta$ atu0526            | Derivative of C58 in which <i>atu0526</i> was deleted                                                                                                                                  | This study                     |
| $\Delta$ atu0526-C          | Complemented strain of $\Delta$ atu0526 by <i>atu0526</i> gene harbored on plasmid pCB301- <i>atu0526</i>                                                                              | This study                     |
| R115A-C                     | Complemented strain of $\Delta$ atu0526 by plasmid pCB301- <i>atu0526</i> <sub>R115A</sub> , in which the arginine at position 115 was mutated into alanine in the sequence of protein | This study                     |
| GFP                         | $\Delta$ atu0526 strain with pCB301-GPF transformed in.                                                                                                                                | This study                     |
| Atu0526-GFP                 | Complemented strain of $\Delta$ atu0526 by <i>atu0526</i> fused with GPF harbored on plasmid pCB301- <i>atu0526</i> -GPF                                                               | This study                     |
| R115A-GPF                   | Derivative of Atu0526-GFP strain, in which the arginine at position 115 of Atu0526 was mutated into alanine in the sequence of protein                                                 | This study                     |
| <b>Plasmids</b>             |                                                                                                                                                                                        |                                |
| pEX18Km                     | Gene replacement vector carrying a counter selectable marker <i>sacB</i> , <i>oriT</i> , Km <sup>R</sup>                                                                               | [3,4]                          |
| pEX18Km- <i>atu0526</i>     | pEX18Km carrying the upstream and downstream fragments of <i>atu0526</i> gene, Km <sup>R</sup> ; for the deletion of <i>atu0526</i> gene                                               | This study                     |

|                        |                                                                                       |                 |
|------------------------|---------------------------------------------------------------------------------------|-----------------|
| pCB301                 | A mini binary vector plasmid, with MCS from pBI101, Km <sup>R</sup>                   | [5]             |
| pCB301- <i>atu0526</i> | pCB301 carrying <i>atu0526</i> gene and its native promoter sequence, Km <sup>R</sup> | This study      |
| pTRG                   | pTRG target plasmid in BacterioMatch™ Two-Hybrid System                               | BacterioMatch™  |
| pTB                    | pBT bait plasmid in BacterioMatch™ Two-Hybrid System                                  | BacterioMatch™  |
| pTB-Atu0526            | pTB plasmid with <i>atu0526</i> gene inserted                                         | This study      |
| pTRG-CheW1             | pTRG plasmid with <i>cheW1</i> gene inserted                                          | This study      |
| pTRG-CheW2             | pTRG plasmid with <i>cheW2</i> gene inserted                                          | This study      |
| pTRG-GALL <sup>P</sup> | pTRG plasmid with GALL <sup>P</sup> gene inserted                                     | BacterioMatch™  |
| pTB-LGF2               | pTB plasmid with LGF2 gene inserted                                                   | BacterioMatch™  |
| pET30a                 | pET30a protein expressing plasmid promoted by the T7 promoter                         | EMD Biosciences |
| pET30a-Atu0526LBD      | pET30a plasmid with <i>atu0526LBD</i> gene inserted                                   | This study      |
| pET30a-R115A           | pET30a plasmid with R115A gene inserted                                               | This study      |
| pET30a-6×His-Atu0526   | pET30a plasmid with 6×His-Atu0526 gene inserted                                       | This study      |
| pET30a-6×His-SalT      | pET30a plasmid with 6×His-SalT gene inserted                                          | This study      |

Table S2. Primers used in this study.

| Primers                 | Sequence                                      | Description                                                                                 |
|-------------------------|-----------------------------------------------|---------------------------------------------------------------------------------------------|
| <i>atu0526</i> -F1      | 5'-GCCAGTGCCAAGCITTATGCGGGGCTGGCTCTGC-3'      | To amplify the upstream fragment of <i>atu0526</i>                                          |
| <i>atu0526</i> -R1      | 5'-GACTTTCAAAAATGGAGAGAGAAACAGTTCCCCAAAGCC-3' |                                                                                             |
| <i>atu0526</i> -F2      | 5'-GGCTTTGGGGAAGTGTCTCTCTCCATTTTGAAGTC-3'     | To amplify the downstream fragment of <i>atu0526</i>                                        |
| <i>atu0526</i> -R2      | 5'-GGTACCCGGGGATCCCCGTCTTCATGGCATTCG-3'       |                                                                                             |
| 0526C-F                 | 5'-CGCGGATCCCCGTCAATGCCTATCTCGGTTTCG-3'       | To amplify <i>atu0526</i> gene or its single amino acid mutant with its promoter            |
| 0526C-R                 | 5'-CCGCTCGAGTCAGGCCGCCGGTTCAA-3'              |                                                                                             |
| R115A-F                 | 5'-GGTCAGTGCAATGAATTCGCCGGCCTTGGCTTC-3'       | To mutate LBD of <i>Atu0526</i> with arginine at position of 115 replaced by alanine        |
| R115A-R                 | 5'-TTCATTGCACTGACCACCAATCTGAAGAATGAAAAGG-3'   |                                                                                             |
| LBD-F                   | 5'-ATCGGATCCGAATTCCTTGAAGGACAACATCATCAC-3'    | To amplify LBD of <i>atu0526</i> or R115A for inserting into pET30a                         |
| LBD-R                   | 5'-GTGGTGGTGCTCGAGTTACATATCACGCAGGCTGTA-3'    |                                                                                             |
| pET30 <i>atu0526</i> -F | 5'-ATCGGATCCGAATTCATGCACAACCGGCTCTTTAAGTCC-3' | To amplify full length <i>atu0526</i> for inserting into pET30a                             |
| pET30 <i>atu0526</i> -R | 5'-GTGGTGGTGCTCGAGTTATCAGGCCGCCGGTTCAA-3'     |                                                                                             |
| <i>atu0526</i> -GFP-F1  | 5'-CGCGGATCCCCGTCAATGCCTATCTCGGTTTCG-3'       | To amplify <i>atu0526</i> or its single amino acid mutant with its promoter for fusing eGFP |
| <i>atu0526</i> -GFP-R1  | 5'-CTCGCCCTTGCTCACCATTAGGCCGCCGGTTCAA-3'      |                                                                                             |
| <i>atu0526</i> -GFP-F2  | 5'-TTGAACCGGGCGGCCTGAATGGTGAGCAAGGGCGAG-3'    | To amplify eGFP for fusing <i>atu0526</i> or its single amino acid mutant                   |
| <i>atu0526</i> -GFP-R2  | 5'-CCGCTCGAGTTACTTGTACAGCTCGTCCATGCC-3'       |                                                                                             |
| GFP-F                   | 5'-CGCGGATCCATGGTGAGCAAGGGCGAG-3'             | To amplify eGFP for inserting into pCB301                                                   |
| GFP-R                   | 5'-CCGCTCGAGTTACTTGTACAGCTCGTCCATGCC-3'       |                                                                                             |
| pTRG <i>atu0526</i> -F  | 5'-GAGGCGGCCGGATCCATGCACAACCGGCTCTTTAAGTCC-3' | To amplify <i>atu0526</i> for inserting into pTRG                                           |

|                   |                                            |                                                    |
|-------------------|--------------------------------------------|----------------------------------------------------|
| pTRGatu052<br>6-R | 5'-GCTCAGACTGAATTCCTTATCAGGCCGCCCGTTCAA-3' |                                                    |
| pBTcheW1-<br>F    | 5'-GGCCGCATCGAATTCATGTCCAACGCCATCAAGCAA-3' | To amplify <i>cheW1</i> for inserting<br>into pBT  |
| pBTcheW1-<br>R    | 5'-TTAACTCGAGGATCCTCAGGCCGCTTCGCGCGCC-3'   |                                                    |
| pBTcheW2-<br>F    | 5'-GGCCGCATCGAATTCCTGATGGCAATGATTAAGTC-3'  | To amplify <i>cheW2</i> for inserting<br>into pBT  |
| pBTcheW2-<br>R    | 5'-TTAACTCGAGGATCCAGGCCGCAAGATCTTCGG-3'    |                                                    |
| pTRGcheW<br>1-F   | 5'-GAGGCGGCCGGATCCATGTCCAACGCCATCAAGCAA-3' | To amplify <i>cheW1</i> for inserting<br>into pTRG |
| pTRGcheW<br>1-R   | 5'-GCTCAGACTGAATTCCTCAGGCCGCTTCGCGCGCC-3'  |                                                    |
| pTRGcheW<br>2-F   | 5'-GAGGCGGCCGGATCCCTGATGGCAATGATTAAGTC-3'  | To amplify <i>cheW2</i> for inserting<br>into pTRG |
| pTRGcheW<br>2-R   | 5'-GCTCAGACTGAATTCAGGCCGCAAGATCTTCGG-3'    |                                                    |

The underlines indicate restriction sites.

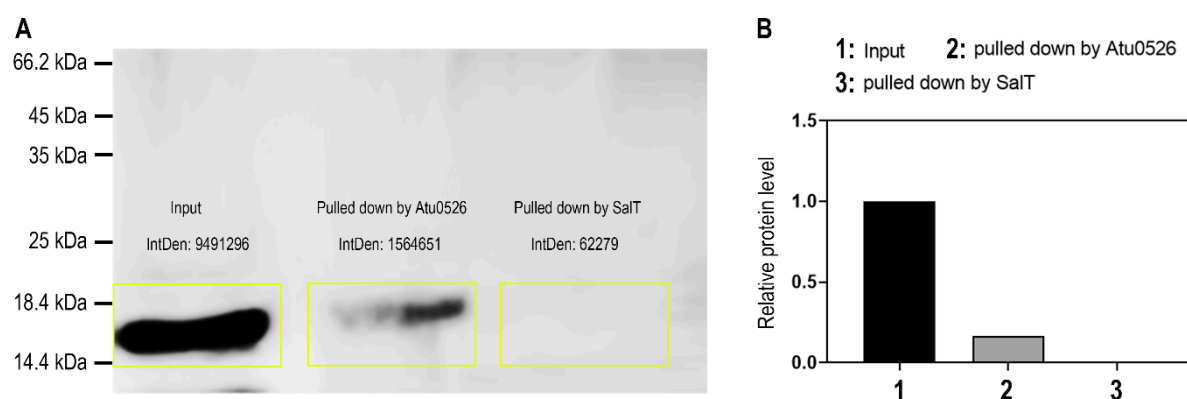

**Figure S1.** Western blotting of the pull-down proteins using CheW1 antibody. (A) Original blot image of Figure 1C upper part. Lines from left to right are input, 6×His-tagged Atu0526 and 6×His-tagged SalT. The IntDEN is read by ImageJ (National Institutes of Health, Maryland, USA). Prior to the readings, images were converted to grayscale as follows: Image → Type → 8 bit, next: Image → Adjust → Brightness/Contrast → Auto. The densitometry/intensity (IntDen) is read from the area of the yellow rectangle. (B) Relative protein level indicated by the densitometry/intensity reading in (A). The value is the ratio of each densitometry/intensity reading to that of the band of "Input" line.

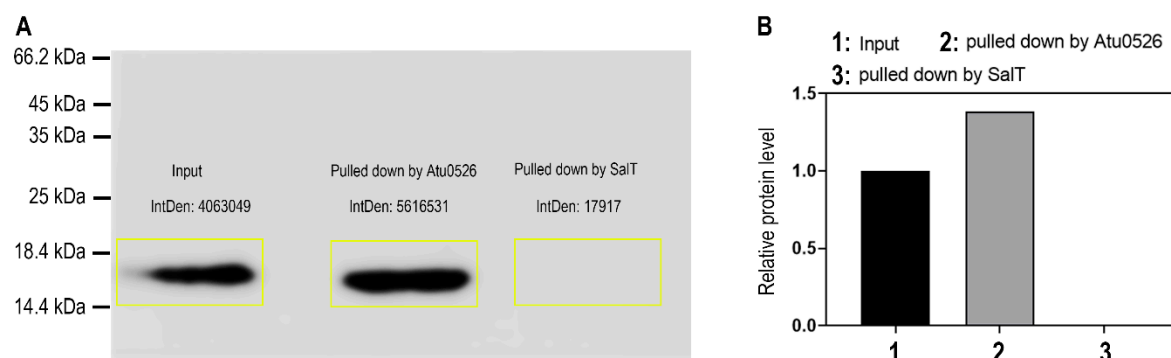

**Figure S2.** Western blotting of the pull-down proteins using CheW2 antibody. (A) Original blot image of Figure 1C lower part. Lines from left to right are input, 6×His-tagged Atu0526 and 6×His-tagged SalT. The IntDEN is read by ImageJ (National Institutes of Health, Maryland, USA). Prior to the readings, images were converted to grayscale as

follows: Image -> Type -> 8 bit, next: Image -> Adjust-> Brightness/Contrast -> Auto. The densitometry/intensity is read from the area of the yellow rectangle. (B) Relative protein level indicated by the densitometry/intensity reading in (A). The value is the ratio of each densitometry/intensity reading to that of the band of "Input" line.

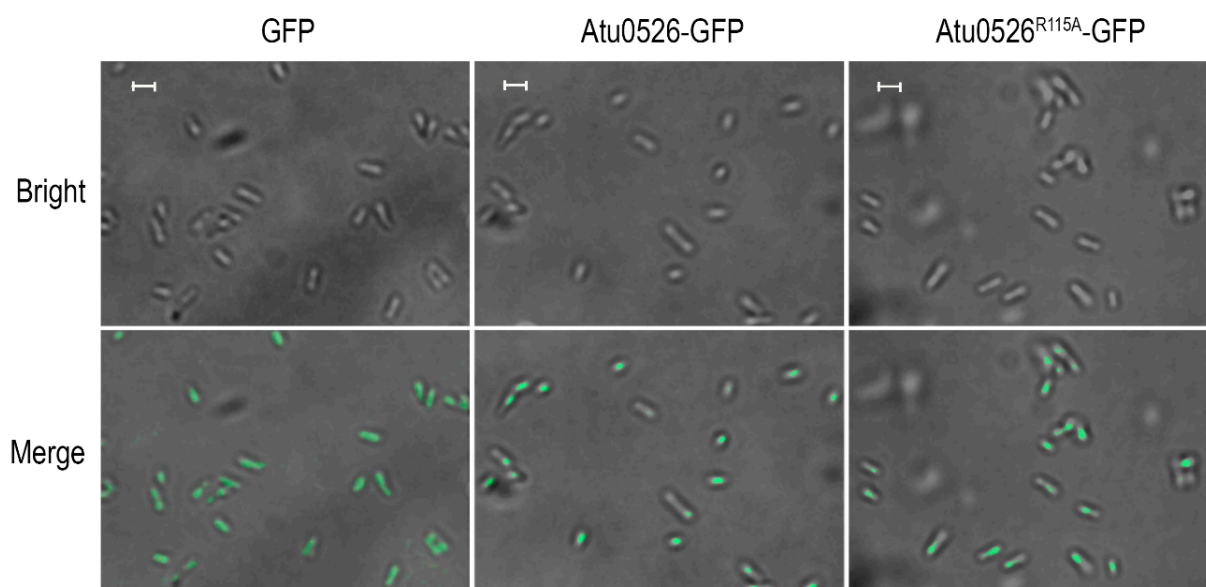

**Figure S3.** Localization of Atu0526-GFP and Atu0526<sup>R115A</sup>-GFP. 'Bright' indicates the images taken under the brightfield, and 'Merged' indicates combinations of pictures from fluorescent and bright field. The scale bar on the picture represents a length of 2  $\mu\text{m}$ .

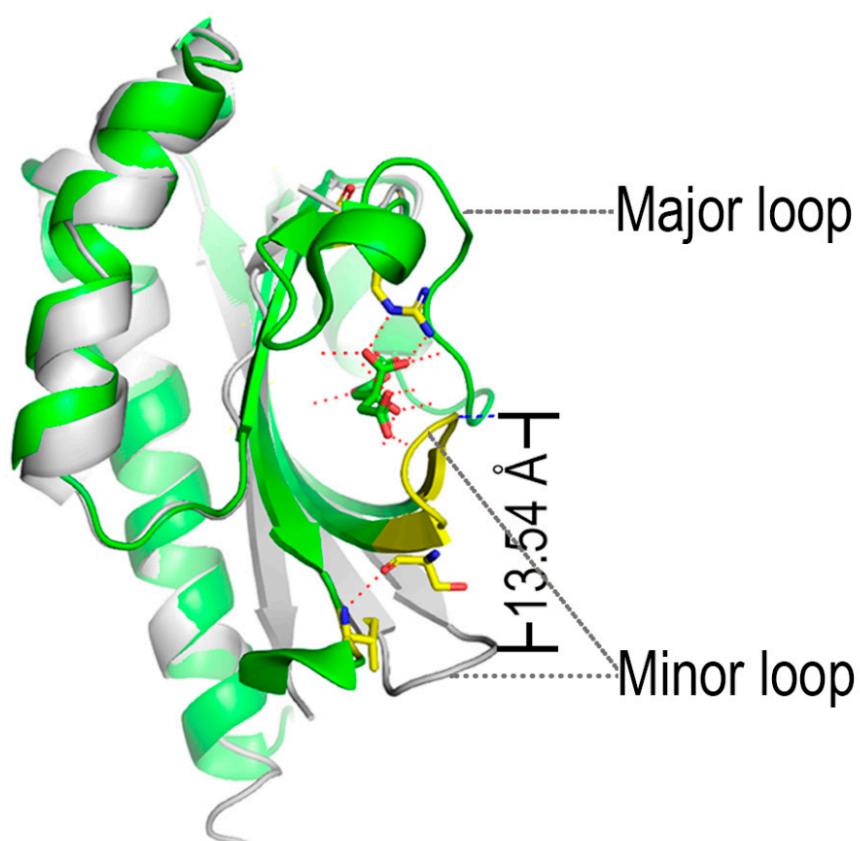

**Figure S4.** The structures of periplasmic domain of CitA with ligand (Green, 2J80) and without ligand (gray, 2V9A) [51]. The minor loop has a maximum displacement of 13.45 Å in these cases. The hydrogen bonds between the ligand and the protein are represented by red dashed lines, and the

hydrogen bond between the C-terminal residue of the fifth  $\beta$ -sheet and the nearby residue in the minor loop is indicated by a red dashed line. The key arginine residues, minor loops and C-terminal residue of the fifth  $\beta$ -sheet are all shown in yellow.

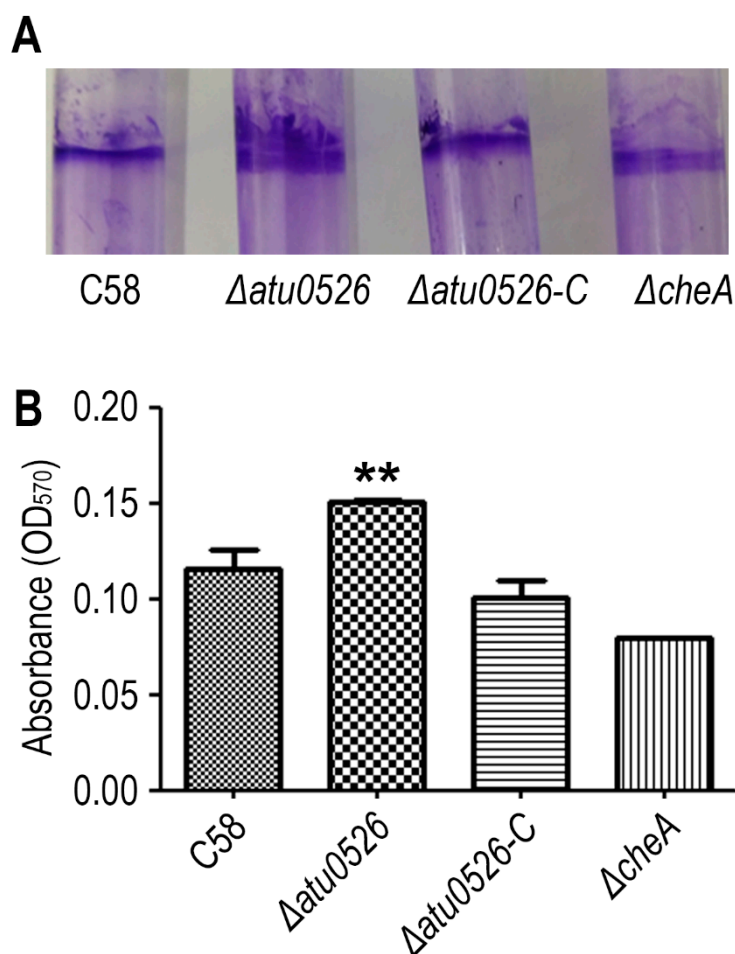

**Figure S5.** Biofilm formation of C58,  $\Delta$ atu0526,  $\Delta$ atu0526-C and  $\Delta$ cheA. (A) The bacterial biofilm identified by crystal violet staining. (B) Quantification analysis of biofilm formation of each strain. Significant difference ( $p < 0.01$ ) between C58 and  $\Delta$ atu0526 is indicated by \*\*.

## References

- Studier, F.W.; Moffatt, B.A. Use of bacteriophage T7 RNA polymerase to direct selective high-level expression of cloned genes. *J. Mol. Biol.* **1986**, *189*, 113–130.
- Thomashow, M.F.; Nutter, R.; Montoya, A.L.; Gordon, M.P.; Nester, E.W. Integration and organization of Ti plasmid sequences in crown gall tumors. *Cell* **1980**, *19*, 729–739.
- Hoang, T.T.; Karkhoff-Schweizer, R.R.; Kutchma, A.J.; Schweizer, H.P. A broad-host-range Flp-FRT recombination system for sites specific excision of chromosomally-located DNA sequences: Application for isolation of unmarked *Pseudomonas aeruginosa* mutants. *Gene* **1998**, *212*, 77–86.
- Guo, M.; Hou, Q.M.; Hew, C.L.; Pan, S.Q. *Agrobacterium* VirD2-binding protein is involved in tumorigenesis and redundantly encoded in conjugative transfer gene clusters. *Mol. Plant Microbe Interact.* **2007**, *20*, 1201–1212.
- Xiang, C.; Han, P.; Lutziger, I.; Wang, K.; Oliver, D.J. A mini binary vector series for plant transformation. *Plant Mol. Biol.* **1999**, *40*, 711–717.
